# Supplementary material
Source: PubMed Central journal article supplement (PMC5336529)
Supplement: NIHMS850603-supplement-Supplemental.pdf [file NIHMS850603-supplement-Supplemental.pdf]

## Supporting Information

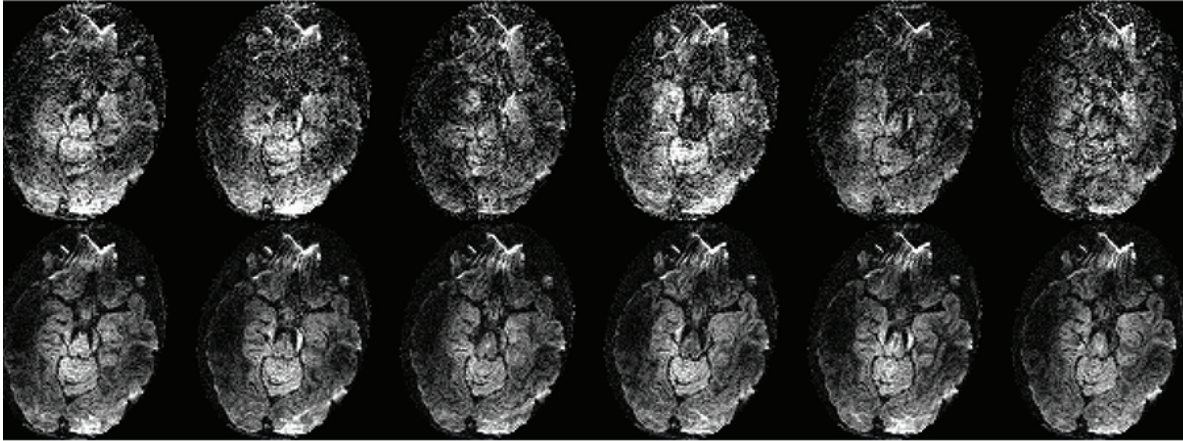

Figure S1: DWIs reconstructed from a 6-direction ( $b=1000\text{ s/mm}^2$ ) 4-shot acquisition using conventional SENSE method (top row) and the proposed MUSSELS method (bottom row). Both methods use the coil sensitivity information only and do not use motion-induced phase estimates in the reconstruction. Conventional SENSE cannot achieve motion compensation while MUSSELS can recover artifact-free DWIs.

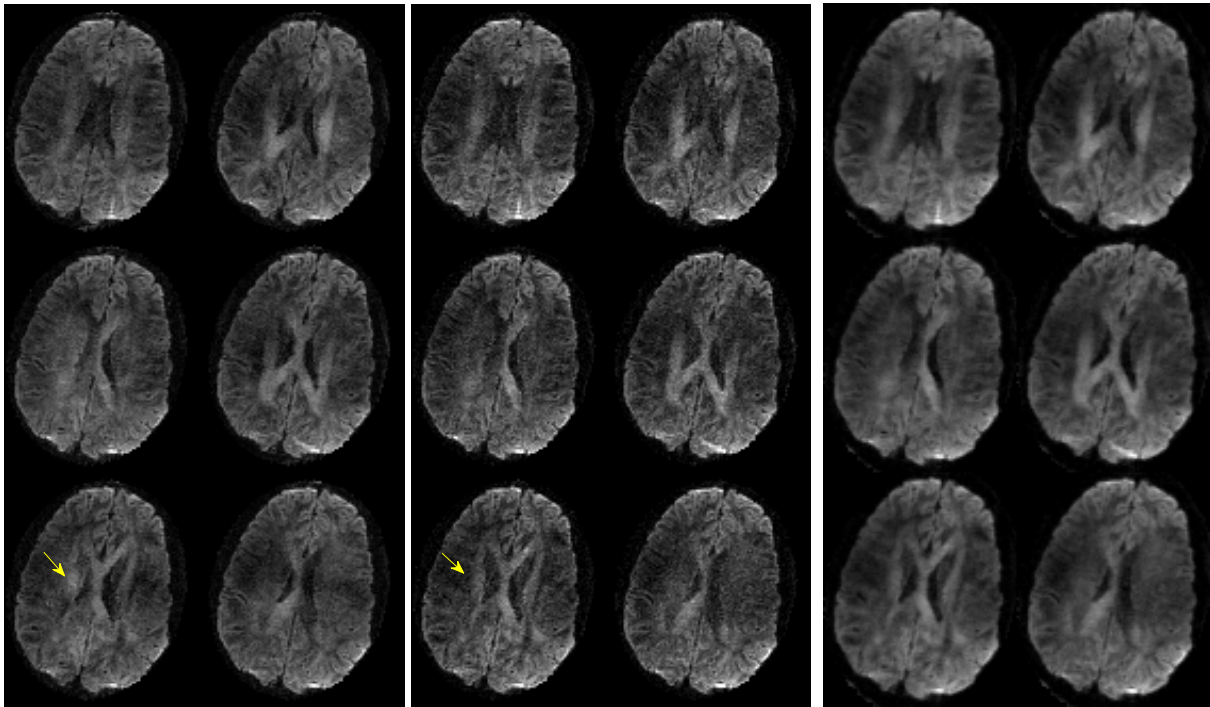

(a) POCSMUSE DWIs

(b) MUSSELS DWIs

(c) SR-MUSSELS DWIs

Figure S2: Reconstruction of the 6 DWIs from a noisy 4-shot 6-direction acquisition.

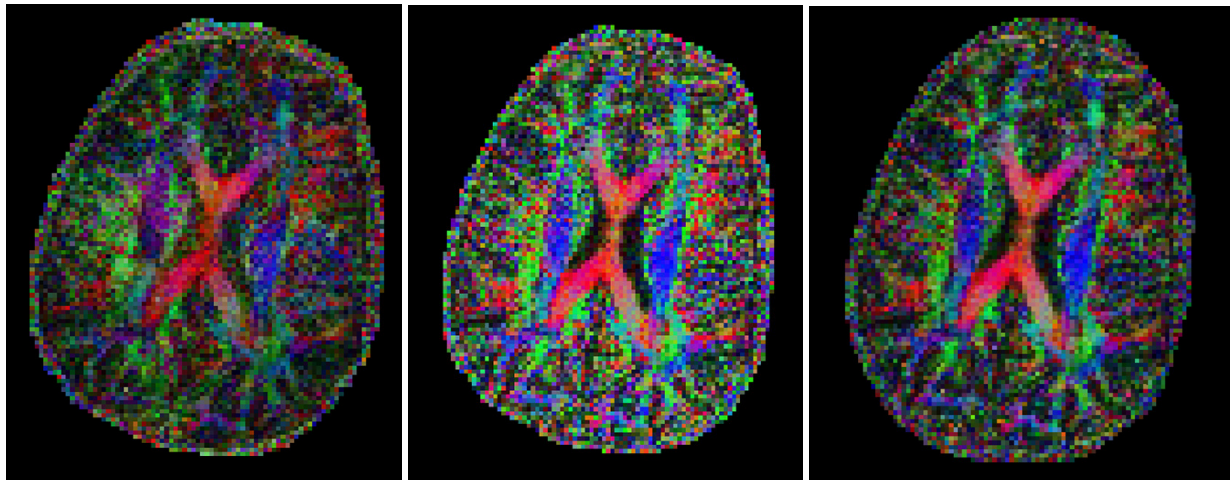

(a) POCSMUSE FA

(b) MUSSELS FA

(c) SR-MUSSELS FA

Figure S3: The FA maps computed from the noisy 4-shot 6-direction acquisition. The FA maps clearly show that the SR-MUSSELS offers robust reconstruction of noisy data while POCSMUSE reconstructions show visible artifacts.
